# Supplementary material for: Ionic liquids based on N-alkyl-N-methylmorpholinium salts as potential electrolytesElectronic supplementary information (ESI) available: the method of measurement of ionic conductivities. See http://www.rsc.org/suppdata/cc/b4/b400198b/
Source: Royal Society of Chemistry journal article supplement (doi:10.1039/b400198b), 2004-01-01
Supplement: b400198b.doc [file b400198b.doc]

***Supplementary Information***

*Preparation of the films of IL + Kynar*

Kynar 761 (ATOCHEM) was used to prepare the films for measuring the ionic conductivities of ILs.

Kynar (30 weight%) and IL (70 weight%) were mixed in N,N-dimethylformamide (DMF) at room temperature for 24h. This mixture was poured on a flat glass and flatted by doctorblade. After rigorous drying in vacuum oven films were obtained.

After the films were sandwiched between the two stainless steel electrodes the conductivities of IL were measured.
